RESEARCH ARTICLE

# Dectin-1 Polymorphism: A Genetic Disease Specifier in Autism Spectrum Disorders?

Meriem Bennabi<sup>1,2,3</sup>, Richard Delorme<sup>4,5</sup>, José Oliveira<sup>1,2,3</sup>, Catherine Fortier<sup>6</sup>, Mohamed Lajnef<sup>2,3</sup>, Wahid Boukouaci<sup>1</sup>, Jean-Paul Feugeas<sup>7,8</sup>, François Marzais<sup>6</sup>, Alexandru Gaman<sup>2,3</sup>, Dominique Charron<sup>6,8</sup>, Bijan Ghaleh<sup>9</sup>, Rajagopal Krishnamoorthy<sup>1,3</sup>, Marion Leboyer<sup>2,3,10,11‡</sup>, Ryad Tamouza<sup>1,3,6,8\*‡</sup>

**1** INSERM, U1160, Hôpital Saint Louis, Paris, France, **2** INSERM, U955, Psychiatrie Génétique, Créteil, France, **3** Fondation FondaMental, Créteil, France, **4** DHU Protect, Service de Psychiatrie de l'Enfant et de l'Adolescent, Hôpital Robert Debré, Paris, France, **5** Département de Génétique Humaine et Fonctions Cognitives, Institut Pasteur, Paris, France, **6** Laboratoire Jean Dausset and LabEx Transplantex, Hôpital Saint Louis, Paris, France, **7** INSERM, U1137, Hôpital Bichat, Paris, France, **8** Université Paris Diderot, Sorbonne Paris-Cité, Paris, France, **9** Centre de Ressources Biologiques, Hôpitaux Universitaires Henri Mondor, Créteil, France, **10** AP-HP, Pôle de Psychiatrie, DHU PePSY, Hôpitaux Universitaires Henri Mondor, Créteil, France, **11** Université Paris-Est, Faculté de Médecine, Créteil, France

‡ These authors are co-senior authors on this work.

\* [tamouza.ryad@gmail.com](mailto:tamouza.ryad@gmail.com)

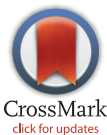

**OPEN ACCESS**

**Citation:** Bennabi M, Delorme R, Oliveira J, Fortier C, Lajnef M, Boukouaci W, et al. (2015) Dectin-1 Polymorphism: A Genetic Disease Specifier in Autism Spectrum Disorders? PLoS ONE 10(9): e0137339. doi:10.1371/journal.pone.0137339

**Editor:** Valerie W. Hu, The George Washington University, UNITED STATES

**Received:** March 25, 2015

**Accepted:** August 14, 2015

**Published:** September 9, 2015

**Copyright:** © 2015 Bennabi et al. This is an open access article distributed under the terms of the [Creative Commons Attribution License](https://creativecommons.org/licenses/by/4.0/), which permits unrestricted use, distribution, and reproduction in any medium, provided the original author and source are credited.

**Data Availability Statement:** All relevant data are entirely within the paper.

**Funding:** The authors have no support or funding to report.

**Competing Interests:** The authors have declared that no competing interests exist.

## Abstract

### Introduction

In autism spectrum disorders (ASD), complex gene-environment interactions contribute to disease onset and progress. Given that gastro-intestinal dysfunctions are common in ASD, we postulated involvement of microbial dysbiosis in ASD and investigated, under a case-control design, the influence of DNA polymorphisms in the *CLEC7A* gene that encodes a pivotal fungal sensor, Dectin-1.

### Material and methods

DNAs from 478 ASD patients and 351 healthy controls (HC) were analyzed for the *CLEC7A* rs16910631G/A and rs2078178 A/G single nucleotide polymorphisms (SNPs). Differences in the distribution of allele, genotype and haplotype by Chi-square testing and nonparametric analysis by Kruskal-Wallis/Mann-Whitney tests, where appropriate, were performed. The free statistical package R.2.13 software was used for the statistical analysis.

### Results

We found that the *CLEC7A* rs2078178 G allele and GG genotype were more prevalent in HC as compared to ASD but failed to reach statistical significance for the latter (pc = 0.01, 0.06 respectively). However, after phenotype-based stratification, the *CLEC7A* rs2078178 G allele and GG genotype were found to be significantly more frequent in the Asperger group as compared to other ASD subsets (pc = 0.02, 0.01), a finding reinforced by haplotype analysis (rs2078178/rs16910631 G-G/G-G) (pc = 0.002). Further, intellectual quotient (IQ)-based stratification of ASD patients revealed that IQ values increase linearly along the

*CLEC7A* rs2078178 AA, AG and GG genotypes ( $p = 0.05$ ) and in a recessive manner (GG vs. AA+AG  $p = 0.02$ ), further confirmed by haplotype distribution (*CLEC7A* rs2078178-16910631; A-G/A-G, A-G/G-G and G-G/G-G,  $p = 0.02$ , G-G/G-G vs. others,  $p = 0.01$ ).

## Conclusion

Our data suggest that the genetic diversity of *CLEC7A* gene influences the ASD phenotype by behaving as a disease specifier and imply that the genetic control of innate immune response could determine the ASD phenotype.

## Introduction

Autism spectrum disorders (ASD) are a heterogeneous group of neurodevelopmental disorders characterized by impairments in social interactions and communication with a restricted repertoire of interests, behavior and activities [1]. Substantial diversity in symptoms and severity of these manifestations led to the diagnostic classification of ASD into three major subtypes namely, Asperger, classical form and pervasive developmental disorders not otherwise specified (PDD-NOS), the important difference between the subtypes being the intellectual quotient (IQ) values [2]. While the heritability of ASD was estimated to be between 40 to 70% in twin studies, in molecular studies of unrelated individuals only 0.5% to 20% of ASD subjects have alterations in genes involved in neuronal and synaptic homeostasis [3, 4]. Such “heritability gap” between twin studies and studies of unrelated patient populations highlighted the prominent influence of environment on genetic liability in the etiology of ASD [5]. In this regard, prior studies reporting on altered innate immune response in ASD are of particular interest in that the innate immune system is the front line defense against environmental infectious stressors. Evidences supporting the immune dysfunction in ASD are several but to cite a few: i) ASD association with single nucleotide polymorphisms (SNPs) located in the major histocompatibility complex (MHC), in particular with IQ variations in patients [6]; ii) Significant correlation between maternal viral/bacterial infections and diagnosis of ASD in the offsprings [7,8,9]; iii) Genetic association of macrophage migration inhibitory factor (MIF) gene polymorphism with behavioral components of ASD [10]; iv) Genetically determined raised circulating levels of HLA-G (with consequent inefficient anti infectious response) conferring raised risk for ASD [11]; v) Association between family history of autoimmune diseases and increased risk of ASD in children [12, 13, 14, 15]; vi) Link between gut microbiota dysbioses and ASD on the one hand [16, 17] and the host immune system on the other [18, 19, 20]; vii) Parallels between peripheral cytokine profiles and changes in behavioral symptoms following immune insults in a subset of ASD children with persistent gastrointestinal symptoms [21] and viii) relationship between the history of intense antibiotic administration (potential cause of gut dysbioses) during early childhood and raised incidence of ASD [22, 23].

Indeed gastrointestinal (GI)-tract dysfunctions are common in children with ASD (23–70%). These ASD children with GI disorders (ASD<sup>GI</sup>) have chronic inflammation with nodular lymphoid hyperplasia, enterocolitis and mucosal infiltration by GI-tract immune cells [24] and the severity of the GI symptoms often paralleled that of ASD and in particular the degree of behavioral impairment [25, 26]. Altogether it is hypothesized that an imbalanced GI mucosal dysbiosis and immune dysfunction during a critical neurodevelopmental window pave the way for “leaky gut” and establish a chronic systemic and neuronal inflammatory setting [22, 23]. These data could explain the particular vulnerability of ASD subjects to intercurrent microbial

infections with GI disturbances [27] and is consistent with the following observations: i) Intestinal microbiota composition in ASD subjects differ, both in number and diversity, from those in healthy control subjects [17]; ii) Monocytes from ASD<sup>GI</sup> patients in culture exhibited innate immune response abnormalities including decreased production of both pro- and anti-inflammatory cytokines and increased expression of chemokine transcripts [27].

Even if the proof of concept of direct involvement of GI microbiome in ASD remains to be firmly established [28], given the above discussed published data, implication of altered genetic control of innate immune response processes to fungal and other microbial species in the etiology and/or severity of ASD is plausible. These immune processes intimately control the host/microbial homeostasis, and are mainly driven by a set of pattern recognition receptors (PRR) such as Dectin-1, encoded by the *CLEC7A* gene on chromosome 12 (12p13.2). Present on the surface of dendritic cells, neutrophils and macrophages, Dectin-1 recognizes and interacts with the  $\beta$ -1,3-glucan molecules present in the cell wall of nearly all fungi [29]. Upon receptor-ligand interaction, intracellular signaling is triggered which in turn induces the expression of pro-inflammatory cytokines and chemokines and engages the T helper (Th) 1 and Th17 cells towards cytotoxic T-cell responses [30, 31]. Interestingly, in humans, two SNPs (*CLEC7A* rs2087178 A and *CLEC7A* rs16910631G), either as allele or haplotype, have been associated with medically-refractory ulcerative colitis (MRUC) [32]. This observation incited us to postulate that such genetic changes in *Dectin-1* could also influence the susceptibility to ASD-associated GI disturbances. To explore this possibility, herein we studied, in a case-control design, the influence of *CLEC7A* gene polymorphisms (rs2078178 and rs16910631) on ASD clinical categories with IQ as proxy for the GI status in ASD.

## Material and Methods

### Subjects and clinical assessments

This study was conducted in a sample of subjects with ASD enrolled in the PARIS (Paris Autism Research International Sibpair) cohort in specialized clinical neuropsychiatric centers established in France and in Sweden [33]. Diagnosis was based on comprehensive clinical evaluation by expert clinicians using DSM IV-TR criteria. Subjects were assessed with the Autism Diagnostic Interview-Revised (ADI-R) and most of them also with the Autism Diagnostic Observation Scale (ADOS). Cases were included only after a thorough clinical evaluation, including psychiatric and neuropsychological examination, standard karyotyping, and fragile-X testing, as well as brain imaging and EEG as required. The IQ evaluation was carried out with an age-appropriate Weschler scale (WPPSI, Wechsler Preschool and Primary Scale of Intelligence; WISC, Wechsler Intelligence Scale for Children; or WASI, Wechsler Abbreviated Scale of Intelligence). For the most severe and/or non-verbal patients, the Raven's Standard Progressive Matrices were used to measure nonverbal IQ (NVIQ) and the Peabody Picture Vocabulary Test (PPVT-4th edition) to measure receptive vocabulary (RV). The healthy control (HC) group consists of clinically assessed unrelated healthy individuals, both enrolled under the previously published selective criteria [34, 35]. All controls and most of the individuals included were of European descent.

Written informed consent was obtained from all participants including caretakers/guardians on behalf of minors/children included in the study and the documents recorded and stored in each participant center (Paris and Gothenburg). The study was approved by a local Institutional Review Board (IRB) i.e. the "Comités de Protection des Personnes (CPP) Île-de-France, Hôpital Pitié-Salpêtrière 75013 Paris" for France and the "Sahlgrenska Academy Ethics committee, University of Gothenburg" for Sweden.

## CLEC7A genotyping

Genomic DNA was extracted from EDTA-treated peripheral blood samples or B-lymphoblastoid cell lines using the Nucleon BACC3 kit (GE HealthCare, Chalfont St Giles, UK). The genotyping of the two SNPs herein studied (intron 1 *rs16910631*G/A and intron 3 *rs2078178* A/G) was performed using a TaqMan 5'-nuclease assay (Applied Biosystems, Foster City, CA, USA) with allele-specific fluorogenic oligonucleotide probes. The following pre-developed TaqMan assay genotyping kits were used: C\_33748498\_10 and C\_1932439\_10.

## Statistical analysis

Power calculation was used in order to detect a statistically significant difference between two proportions with specified levels of confidence (0.95) and effect size. Comparison of genotype and allele frequency between patients and controls were performed using the Chi-square testing. The *p* values (two tailed) were corrected (*pc*) using the Bonferroni method and findings were considered statistically significant for *pc* less than 0.05. Odds ratio (OR) and confidence interval 95% (CI95%) were calculated to assess the relative risk conferred by a specific allele, genotype or haplotype. Deviation, if any, from Hardy-Weinberg expectations was analyzed using the chi-square test. For haplotype reconstruction, PHASE software (version 2.1) was used. This Bayesian algorithm provides the most-likely pairs of haplotypes carried by each subject [36, 37]. The tests Kruskal-Wallis or Mann-Whitney were used for nonparametric analysis [distribution of *CLEC7A* genotypes and haplotypes according to intellectual quotient (IQ) values]. High-IQ patients were defined as those with IQ values greater than 80, while low-IQ as those with IQ values between 25 and 70. Linear regression analyses were performed to examine the relationship between IQ, *CLEC7A* genotype and diagnosis as the predictive variables. The model was  $QI \sim \text{Genotypes} + \text{diagnosis}$ . IQ was square root transformed to fulfill the normality assumption required by the parametric procedure. By default, calculations assume that a two-tailed statistical test was used at a confidence level of 95%. All statistical analyses were performed using the free statistical package R.2.13 software.

## Results

A sample of 478 subjects with ASD (364 males and 102 females), with a mean age of  $15.42 \pm 9.71$  years (mean  $\pm$  SD) (3 to 60 years) was included and compared to 351 controls (171 males and 160 females) with a mean age of  $35.69 \pm 15.47$  years (range 4 to 64 years) (Table 1).

For the present study, power calculation was made using the data from Illiev *et al*, and a theoretical statistical power of 84.8% was obtained.

Allele, genotype and haplotype distributions of the two *CLEC7A* polymorphisms are summarized in Tables 2 to 5. For both genetic variations the observed genotype distribution satisfied the expected Hardy-Weinberg proportions.

We found that the *CLEC7A rs2078178* wild type G allele and GG genotype were more frequent in HC as compared to individuals with ASD, although the statistical significance was borderline for the GG genotype association after correction (G allele: 77% vs. 71%;  $p = 0.008$ ,  $pc = 0.01$ , OR = 1.36, [CI95%] = 1.08–1.71; GG genotype 61% vs. 53%;  $p = 0.03$ ,  $pc = 0.06$ ; OR = 0.74, [95%CI] = 0.55–0.98 for controls and patients respectively) (Table 2). The distribution of alleles and genotypes of the *CLEC7A rs16910631* polymorphism did not significantly differ between patients and HC.

We then analyzed the distribution of these two genetic variations according to clinical specifiers of ASD i.e. classical autism, Asperger and PDD-NOS. We found that the *CLEC7A rs2078178* G allele and GG genotype were more frequent among Asperger patients as compared to other ASD types (classical autism and PDD-NOS) (G allele and GG genotype: 82 vs.

**Table 1. Demographic and clinical data of ASD patients and healthy controls.**

|                                    |          | ASD patients        | Healthy Controls (HC) |
|------------------------------------|----------|---------------------|-----------------------|
| <b>Mean Age years ± SD (range)</b> |          | 15.42 ± 9.71 (3–60) | 35.69 ± 15.47 (4–64)  |
| <b>Sex</b>                         | Male     | 364 (78%)           | 171 (52%)             |
|                                    | Female   | 102 (22%)           | 160 (48%)             |
| <b>DSM-IV TR Diagnosis</b>         | Asperger | 56 (14%)            |                       |
|                                    | CA       | 331 (83%)           |                       |
|                                    | PDD-NOS  | 13 (3%)             |                       |

ASD: autism spectrum disorders  
 SD: standard deviation  
 CA: Classical autism  
 PDD-NOS: pervasive developmental disorders not otherwise specified.

doi:10.1371/journal.pone.0137339.t001

70%,  $p = 0.01$ ,  $pc = 0.02$ ,  $OR = 1.95$ ,  $[CI95\%] = 1.16–3.41$  and 71 vs. 51%,  $p = 0.006$ ,  $pc = 0.01$   $OR = 2.37$ ,  $[CI95\%] = 1.25–4.68$  in Asperger and non-Asperger respectively) (Table 3).

A further distinction of non-Asperger groups allowed us to confirm the Asperger-related *CLEC7A* rs2078178 G allele and GG genotype signature (G allele and GG genotype: 82 vs. 70%,  $p = 0.009$ ,  $pc = 0.01$ ,  $OR = 1.95$ ,  $[CI95\%] = 1.15–3.43$  and 71 vs. 50%,  $p = 0.005$ ,  $pc = 0.01$   $OR = 2.42$ ,  $[CI95\%] = 1.26–4.83$  in Asperger and classical autism respectively; 82 vs. 70%  $p = 0.02$ ,  $pc = 0.04$ ,  $OR = 1.95$ ,  $[CI95\%] = 1.06–3.67$  and 71 vs. 53%,  $p = 0.03$ ,  $pc = 0.06$   $OR = 2.18$ ,  $[CI95\%] = 1.02–4.79$  in Asperger and PDD-NOS respectively (Table 4).

Phased polymorphic profiles allowed us to identify three common haplotype-based genotypes viz the *CLEC7A* rs2078178/rs16910631 A-G/A-G, A-G/G-G and G-G/G-G genotypes. Further analysis confirmed the previous findings in that the *CLEC7A* G-G/G-G genotype is more prevalent in the Asperger group (*CLEC7A* G-G/G-G vs. other, 80% vs. 54%,  $p = 0.001$ ,  $pc = 0.002$ ,  $OR = 3.38$ ,  $[CI95\%] = 1.54–8.19$ ) (Table 5).

As disease specifiers are expected to be associated with functional grade, at least in terms of degree of the accompanying intellectual disability, we analyzed the distribution of the *CLEC7A* genotype frequencies according to the IQ score distribution pattern. We found that mean IQ

**Table 2. *CLEC7A* genotype and allele frequencies among patients and controls.**

| <i>CLEC7A</i> variant |                 | ASD |    | HC  |    | p     | pc   | OR   | 95% CI    |
|-----------------------|-----------------|-----|----|-----|----|-------|------|------|-----------|
|                       |                 | n   | %  | n   | %  |       |      |      |           |
| rs2078178             | <b>Genotype</b> |     |    |     |    |       |      |      |           |
|                       | GG              | 253 | 53 | 212 | 61 | 0.03  | 0.06 | 0.74 | 0.55–0.98 |
|                       | AA+AG           | 224 | 47 | 138 | 39 |       |      |      |           |
| rs2078178             | <b>Allele</b>   |     |    |     |    |       |      |      |           |
|                       | A               | 275 | 29 | 161 | 23 | 0.008 | 0.01 | 1.36 | 1.08–1.71 |
|                       | G               | 679 | 71 | 539 | 77 |       |      |      |           |

ASD: autism spectrum disorders  
 HC: healthy controls  
 n: number  
 pc: corrected p-value  
 OR: odds ratio; 95%  
 CI: confidence interval 95%.

doi:10.1371/journal.pone.0137339.t002

**Table 3. *CLEC7A* alleles and genotypes distribution in patients with Asperger and other ASD types.**

| <i>CLEC7A</i> variant |                 | Asperger |    | Other ASD |    | p     | p <sub>c</sub> | OR   | 95% CI    |
|-----------------------|-----------------|----------|----|-----------|----|-------|----------------|------|-----------|
|                       |                 | n        | %  | n         | %  |       |                |      |           |
| rs2078178             | <b>Genotype</b> |          |    |           |    |       |                |      |           |
|                       | GG              | 39       | 71 | 214       | 51 | 0.006 | 0.01           | 2.37 | 1.25–4.68 |
|                       | AA+AG           | 16       | 29 | 208       | 49 |       |                |      |           |
| <b>Allele</b>         |                 |          |    |           |    |       |                |      |           |
| rs2078178             | A               | 20       | 18 | 255       | 30 | 0.01  | 0.02           | 1.95 | 1.16–3.41 |
|                       | G               | 90       | 82 | 589       | 70 |       |                |      |           |

Other ASD: Classical autism and PDD-NOS

n: number

p<sub>c</sub>: corrected p-value

OR: odds ratio; 95%

CI: confidence interval 95%.

doi:10.1371/journal.pone.0137339.t003

values exhibit increasing trend along the *CLEC7A* genotype groups: rs2078178 AA, AG and GG genotypes with respective IQ mean scores 55.7/ 59.3/ 67.4 (p = 0.05) with similar trend for *CLEC7A* rs2078178 GG vs. AA+AG genotypes (p = 0.02) (Fig 1). These data were further confirmed and strengthened by haplotype-based genotypes *CLEC7A* (genotype distribution frequencies according to IQ score distributions: *CLEC7A* rs2078178/rs16910631 A-G/A-G, A-G/G-G and G-G/G-G with p = 0.02; and *CLEC7A* G-G/G-G vs. others with p = 0.01) (Fig 1).

**Table 4. *CLEC7A* alleles and genotypes distribution in patients with classical autism, Asperger and PDD-NOS.**

| <i>CLEC7A</i> variant |                 | Asperger |    | CA  |    | p     | p <sub>c</sub> | OR   | 95% CI    |
|-----------------------|-----------------|----------|----|-----|----|-------|----------------|------|-----------|
|                       |                 | n        | %  | n   | %  |       |                |      |           |
| rs2078178             | <b>Genotype</b> |          |    |     |    |       |                |      |           |
|                       | GG              | 39       | 71 | 166 | 50 | 0.005 | 0.01           | 2.42 | 1.26–4.83 |
|                       | AA+AG           | 16       | 29 | 165 | 50 |       |                |      |           |
| <b>Allele</b>         |                 |          |    |     |    |       |                |      |           |
| rs2078178             | A               | 20       | 18 | 200 | 30 | 0.009 | 0.01           | 1.95 | 1.15–3.43 |
|                       | G               | 90       | 82 | 462 | 70 |       |                |      |           |

  

| <i>CLEC7A</i> variant |                 | Asperger |    | PDD-NOS |    | p    | p <sub>c</sub> | OR   | 95% CI    |
|-----------------------|-----------------|----------|----|---------|----|------|----------------|------|-----------|
|                       |                 | n        | %  | n       | %  |      |                |      |           |
| rs2078178             | <b>Genotype</b> |          |    |         |    |      |                |      |           |
|                       | GG              | 39       | 71 | 48      | 53 | 0.03 | 0.06           | 2.18 | 1.02–4.79 |
|                       | AA+AG           | 16       | 29 | 43      | 47 |      |                |      |           |
| <b>Allele</b>         |                 |          |    |         |    |      |                |      |           |
| rs2078178             | A               | 20       | 18 | 55      | 30 | 0.02 | 0.04           | 1.95 | 1.06–3.67 |
|                       | G               | 90       | 82 | 127     | 70 |      |                |      |           |

CA: Classical autism

PDD-NOS: pervasive developmental disorders not otherwise specified

n: number

p<sub>c</sub>: corrected p-value

OR: odds ratio; 95%

CI: confidence interval 95%.

doi:10.1371/journal.pone.0137339.t004

**Table 5. Haplotypes distribution in patients with classical autism and Asperger and controls.**

| Chr12 SNP1-SNP2      | Genotype          | Asperger        |    | Other ASD      |    | p     | p <sub>c</sub> | OR   | 95%CI     |
|----------------------|-------------------|-----------------|----|----------------|----|-------|----------------|------|-----------|
|                      |                   | n               | %  | n              | %  |       |                |      |           |
|                      | G-G/G-G           | 36              | 80 | 199            | 54 | 0.001 | 0.002          | 3.38 | 1.54–8.19 |
|                      | A-G/A-G + A-G/G-G | 9               | 20 | 168            | 46 |       |                |      |           |
|                      | <b>Genotype</b>   | <b>Asperger</b> |    | <b>CA</b>      |    |       |                |      |           |
|                      |                   | n               | %  | n              | %  | p     | p <sub>c</sub> | OR   | 95%CI     |
| rs2078178-rs16910631 | G-G/G-G           | 36              | 80 | 154            | 53 | 0.001 | 0.002          | 3.48 | 1.57–8.5  |
|                      | A-G/A-G + A-G/G-G | 9               | 20 | 134            | 47 |       |                |      |           |
|                      | <b>Genotype</b>   | <b>Asperger</b> |    | <b>PDD-NOS</b> |    |       |                |      |           |
|                      |                   | n               | %  | n              | %  | p     | p <sub>c</sub> | OR   | 95%CI     |
|                      | G-G/G-G           | 36              | 80 | 45             | 57 | 0.01  | 0.02           | 3.02 | 1.21–8.06 |
|                      | A-G/A-G + A-G/G-G | 9               | 20 | 34             | 43 |       |                |      |           |

CA: Classical autism

Other ASD: Classical autism and pervasive developmental disorders not otherwise specified (PDD-NOS)

HC: healthy controls

n: number

p<sub>c</sub>: corrected p-value

OR: odds ratio; 95%

CI: confidence interval 95%.

doi:10.1371/journal.pone.0137339.t005

## Discussion

Given the now well documented immune/inflammatory substratum in ASD, genetically altered GI-tract dysbiosis is postulated to contribute to exacerbated inflammatory processes that could distinguish patient subsets with distinct clinical/behavioral phenotype. To explore this aspect, we opted to study the genetic polymorphisms of *CLEC7A* gene encoding Dectin-1 protein, a key molecule involved in fungal-mediated signaling and GI disorders, a common associated condition in ASD. We noted that

1. *CLEC7A* gene *per se* is not associated with susceptibility to ASD
2. *CLEC7A* rs2078178 G allele and GG genotype behave as genetic specifiers of Asperger among ASD
3. A two SNP-based (rs2078178-16910631) *CLEC7A* haplotype analysis confirmed the above finding.
4. Genetic association between this polymorphic locus with objectively assessed IQ values corroborates perfectly with the notion that *CLEC7A* is a genetic specifier in ASD.

These findings are in line with a recent study demonstrating the role of Dectine-1 in mediating ulcerative colitis severity [32]. Indeed, through functional studies in mice and genetic association studies in human, the authors demonstrated that: i) The susceptibility to severe colitis is genetically driven; (ii) Deficiency of Dectine-1 in mice and human cells promotes fungal infection; (iii) Induced colitis in *CLEC7A* knockout mice results in anti-*Saccharomyces cerevisiae* antibody production, the latter often observed in schizophrenia, another major psychiatric disorder; iv) In humans, *CLEC7A* rs2087178 A allele and *CLEC7A* rs2087178A-rs16910631G haplotype is associated with medically-refractory ulcerative colitis (MRUC). The demonstration that the susceptible A-G haplotype is associated with MRUC group, not with

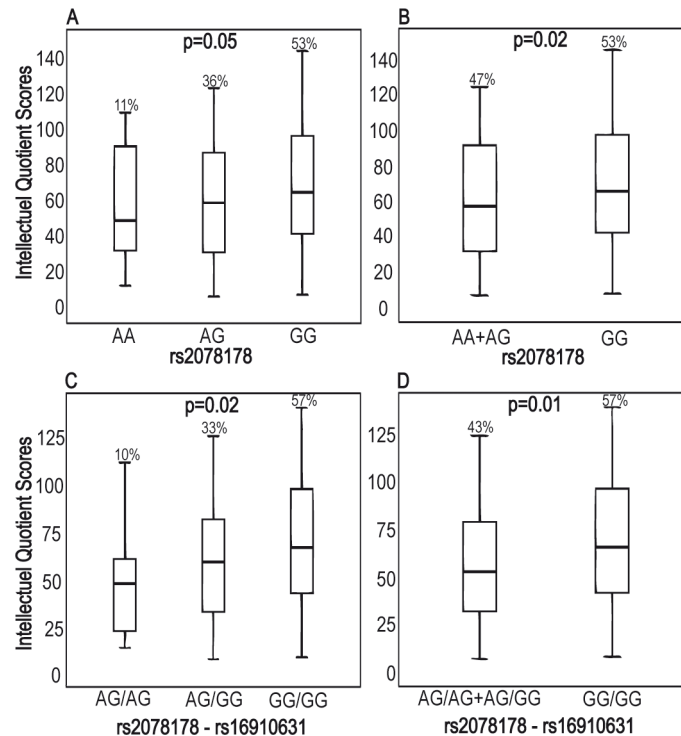

**Fig 1. CLEC7A genotype and haplotype are associated with intellectual quotient (IQ) scores in ASD.** A and B Kruskal-Wallis nonparametric testing show associations between *CLEC7A* genotypes ( $p = 0.05$ ) / haplotypes ( $p = 0.02$ ) and IQ scores. Patients bearing the *CLEC7A* rs2078178 GG or the *CLEC7A* rs2078178/rs16910631 G-G/G-G genotypes have higher IQ scores as compared to other patients. C and D Mann-Whitney nonparametric testing also showed significant associations for similar comparisons (respectively  $p = 0.02$  and  $p = 0.01$ ). The dark line inside the boxes represents the median value for each group. Boxes include the 25th and 75th quartiles; bars outside the boxes represent the maximal and minimal values.

doi:10.1371/journal.pone.0137339.g001

the treatment-responsive UC (TRUC) group, favors the notion that *CLEC7A* behaves as a disease modifier rather than a disease risk locus, a picture similar to what we captured in this study with respect to ASD. Dectin-1 also cooperates with various Toll-like receptors (TLRs) to enlarge the repertoire of antimicrobial defense [38, 39]. Indeed we recently described genetic associations between *TLR2* and *TLR 4* “low expressor” genotypes and bipolar disorder. This further strengthens the so far generated clues that genetically-driven deficient anti-infectious response during a vulnerable ontogenic/neurodevelopmental window may contribute to diverse psychiatric clinical categories and their clinical subsets [34, 40].

In ASD, behavioral symptoms and impaired cognitive skills are often accompanied by various comorbidities, with GI symptoms being the most common and worsening GI symptoms aggravate behavioral symptoms [24, 41, 42, 43].

These findings from chronic inflammatory settings in GI corroborate with our findings in ASD in that the *CLEC7A* AG haplotype, associated with inefficient response and altered immunity is less represented in high functioning Asperger ASD subgroup. This is understandable because the ASD<sup>GI</sup> subgroup relatively runs a more severe course and often low functioning with significant behavioral disturbances. Then the question is why no genetic influence of *CLEC7A* was observed in genome wide association studies (GWAS) both in the context of inflammatory bowel disorder and ASD. As elegantly stated by Iliev et al [32], GWAS study



design is such that it essentially uncovers the susceptibility genes, not those that influences the severity of the disease.

However, the important limitation of our retrospective study is absence of any information regarding the GI status in our patients but this study is an invitation to thoroughly explore the role of genetics of immune defense processes (TLRs, *CLEC7A*, *MHC*) in GI symptoms/dysfunction in ASD by studying large trans-geographic ASD cohorts well defined for potential environmental stressors, GI and IQ phenotypes.

## Acknowledgments

We thank patients with autism spectrum disorders and controls who agreed to participate in this study. We thank FondaMental Foundation, and particularly Hakim Louamri, Nita Nguyen, and Karmene Souyris for data management. We thank Biological resource platform of Henri Mondor Hospital particularly Christel Cabon.

## Author Contributions

Conceived and designed the experiments: MB DC RK M. Leboyer RT. Performed the experiments: MB JO CF WB FM. Analyzed the data: MB M. Lajnef JO JPF. Contributed reagents/materials/analysis tools: RD BG M. Leboyer. Wrote the paper: MB RD AG DC RK M. Leboyer RT.

## References

1. Lauritsen MB. Autism spectrum disorders. *Eur Child Adolesc Psychiatry*. 2013 Feb; 22 Suppl 1:S37–42. doi: [10.1007/s00787-012-0359-5](https://doi.org/10.1007/s00787-012-0359-5) PMID: [23300017](https://pubmed.ncbi.nlm.nih.gov/23300017/)
2. Centers for disease and prevention, CDC reports. Prevalence of Autism Spectrum Disorder Among Children Aged 8 Years—Autism and Developmental Disabilities Monitoring Network, 11 Sites, United States, 2010. 11 sites, United States: *MMWR Surv Summ*; 2014 p. 1–21. Report No.: 63.
3. Huguet G, Ey E, Bourgeron T. The genetic landscapes of autism spectrum disorders. *Annu Rev Genomics Hum Genet*. 2013; 14:191–213. doi: [10.1146/annurev-genom-091212-153431](https://doi.org/10.1146/annurev-genom-091212-153431) PMID: [23875794](https://pubmed.ncbi.nlm.nih.gov/23875794/)
4. Leblond CS, Nava C, Polge A, Gauthier J, Huguet G, Lumbroso S, et al. Meta-analysis of SHANK Mutations in Autism Spectrum Disorders: a gradient of severity in cognitive impairments. *PLoS Genet*. 2014 Sep; 10(9):e1004580. doi: [10.1371/journal.pgen.1004580](https://doi.org/10.1371/journal.pgen.1004580) PMID: [25188300](https://pubmed.ncbi.nlm.nih.gov/25188300/)
5. Toro R, Konyukh M, Delorme R, Leblond C, Chaste P, Fauchereau F, et al. Key role for gene dosage and synaptic homeostasis in autism spectrum disorders. *Trends Genet*. 2010 Aug; 26(8):363–72. doi: [10.1016/j.tig.2010.05.007](https://doi.org/10.1016/j.tig.2010.05.007) PMID: [20609491](https://pubmed.ncbi.nlm.nih.gov/20609491/)
6. Wang HZ, Qin HD, Guo W, Samuels J, Shugart YY. New insights into the genetic mechanism of IQ in autism spectrum disorders. *Front Genet*. 2013 Oct; 18; 4:195. doi: [10.3389/fgene.2013.00195](https://doi.org/10.3389/fgene.2013.00195) PMID: [24151499](https://pubmed.ncbi.nlm.nih.gov/24151499/)
7. Atladóttir HO, Thorsen P, Ostergaard L, Schendel DE, Lemcke S, Abdallah M, Parner ET. Maternal infection requiring hospitalization during pregnancy and autism spectrum disorders. *J Autism Dev Disord*. 2010 Dec; 40 (12):1423–30. doi: [10.1007/s10803-010-1006-y](https://doi.org/10.1007/s10803-010-1006-y) PMID: [20414802](https://pubmed.ncbi.nlm.nih.gov/20414802/)
8. Zerbo O, Qian Y, Yoshida C, Grether JK, Van de Water J, Croen LA. Maternal Infection during Pregnancy and Autism Spectrum Disorders. *J Autism Dev Disord*. 2013 Dec 24. PMID: [24366406](https://pubmed.ncbi.nlm.nih.gov/24366406/)
9. Lee BK, Magnusson C, Gardner RM, Blomström Å, Newschaffer CJ, Burstyn I, Karlsson H, Dalman C. Maternal hospitalization with infection during pregnancy and risk of autism spectrum disorders. *Brain Behav Immun*. 2015 Feb; 44:100–5. doi: [10.1016/j.bbi.2014.09.001](https://doi.org/10.1016/j.bbi.2014.09.001) PMID: [25218900](https://pubmed.ncbi.nlm.nih.gov/25218900/)
10. Grigorenko EL, Han SS, Yrigollen CM, Leng L, Mizue Y, Anderson GM, Mulder EJ, de Bildt A, Minderaa RB, Volkmar FR, Chang JT, Bucala R. Macrophage migration inhibitory factor and autism spectrum disorders. *Pediatrics*. 2008 Aug; 122(2):e438–45. doi: [10.1542/peds.2007-3604](https://doi.org/10.1542/peds.2007-3604) PMID: [18676531](https://pubmed.ncbi.nlm.nih.gov/18676531/)
11. Guerini FR, Bolognesi E, Chiappedi M, Ghezzi A, Canevini MP, Mensi MM, et al. An HLA-G (\*) 14bp insertion/deletion polymorphism associates with the development of autistic spectrum disorders. *Brain Behav Immun*. 2015 Feb; 44: 207–12. doi: [10.1016/j.bbi.2014.10.002](https://doi.org/10.1016/j.bbi.2014.10.002) PMID: [25451607](https://pubmed.ncbi.nlm.nih.gov/25451607/)
12. Comi AM, Zimmerman AW, Frye VH, Law PA, Peeden JN. Familial clustering of autoimmune disorders and evaluation of medical risk factors in autism. *J Child Neurol*. 1999 Jun; 14 (6):388–94. PMID: [10385847](https://pubmed.ncbi.nlm.nih.gov/10385847/)

13. Sweeten TL, Bowyer SL, Posey DJ, Halberstadt GM, McDougle CJ. Increased prevalence of familial autoimmunity in probands with pervasive developmental disorders. *Pediatrics*. 2003 Nov; 112 (5): e420. PMID: [14595086](#)
14. Croen LA, Grether JK, Yoshida CK, Odouli R, Van de Water J. Maternal autoimmune diseases, asthma and allergies, and childhood autism spectrum disorders: a case-control study. *Arch Pediatr Adolesc Med*. 2005 Feb; 159 (2):151–7. PMID: [15699309](#)
15. Wu S, Ding Y, Wu F, Li R, Xie G, Hou J, Mao P. Family history of autoimmune diseases is associated with an increased risk of autism in children: A systematic review and meta-analysis. *Neurosci Biobehav Rev*. 2015 May 15; 55: 322–332. doi: [10.1016/j.neubiorev.2015.05.004](#) PMID: [25981892](#)
16. Finegold SM, Dowd SE, Gontcharova V, Liu C, Henley KE, Wolcott RD, et al. Pyrosequencing study of fecal microflora of autistic and control children. *Anaerobe*. 2010 Aug; 16(4):444–53. doi: [10.1016/j.anaerobe.2010.06.008](#) PMID: [20603222](#)
17. Kang D-W, Park JG, Ilhan ZE, Wallstrom G, Labaer J, Adams JB, et al. Reduced incidence of *Prevotella* and other fermenters in intestinal microflora of autistic children. *PLoS One*. 2013; 8(7):e68322. doi: [10.1371/journal.pone.0068322](#) PMID: [23844187](#)
18. Winter SE, Lopez CA, Bäumlner AJ. The dynamics of gut-associated microbial communities during inflammation. *EMBO Rep*. 2013 Apr; 14(4):319–27. doi: [10.1038/embor.2013.27](#) PMID: [23478337](#)
19. Schippa S, Conte MP. Dysbiotic events in gut microbiota: impact on human health. *Nutrients*. 2014 Dec 11; 6 (12):5786–805. doi: [10.3390/nu6125786](#) PMID: [25514560](#)
20. McLean MH, Dieguez D Jr, Miller LM, Young HA. Does the microbiota play a role in the pathogenesis of autoimmune diseases? *Gut*. 2015 Feb; 64 (2):332–41. doi: [10.1136/gutjnl-2014-308514](#) PMID: [25416067](#)
21. Jyonouchi H, Geng L, Davidow AL. Cytokine profiles by peripheral blood monocytes are associated with changes in behavioral symptoms following immune insults in a subset of ASD subjects: an inflammatory subtype? *J Neuroinflammation*. 2014 Oct 27; 11 (1):187.
22. Niehus R, Lord C. Early medical history of children with autism spectrum disorders. *J Dev Behav Pediatr*. 2006 Apr; 27 (2 Suppl):S120–7. PMID: [16685178](#)
23. Willing BP, Russell SL, Finlay BB. Shifting the balance: antibiotic effects on host microbiota mutualism. *Nat Rev Microbiol*. 2011 Apr; 9 (4):233–43. doi: [10.1038/nrmicro2536](#) PMID: [21358670](#)
24. Buie T, Campbell DB, Fuchs GJ, Furuta GT, Levy J, Vandewater J, et al. Evaluation, diagnosis, and treatment of gastrointestinal disorders in individuals with ASDs: a consensus report. *Pediatrics*. 2010 Jan; 125 Suppl 1:S1–18. doi: [10.1542/peds.2009-1878C](#) PMID: [20048083](#)
25. Valicenti-McDermott M, McVicar K, Rapin I, Wershil BK, Cohen H, Shinnar S. Frequency of gastrointestinal symptoms in children with autistic spectrum disorders and association with family history of autoimmune disease. *J Dev Behav Pediatr*. 2006 Apr; 27 (2 Suppl):S128–36. PMID: [16685179](#)
26. Adams JB, Johansen LJ, Powell LD, Quig D, Rubin RA. Gastrointestinal flora and gastrointestinal status in children with autism—comparisons to typical children and correlation with autism severity. *BMC Gastroenterol*. 2011; 11: 22. doi: [10.1186/1471-230X-11-22](#) PMID: [21410934](#)
27. Jyonouchi H, Geng L, Streck DL, Toruner GA. Children with autism spectrum disorders (ASD) who exhibit chronic gastrointestinal (GI) symptoms and marked fluctuation of behavioral symptoms exhibit distinct innate immune abnormalities and transcriptional profiles of peripheral blood (PB) monocytes. *J Neuroimmunol*. 2011 Sep 15; 238(1–2):73–80. doi: [10.1016/j.jneuroim.2011.07.001](#) PMID: [21803429](#)
28. Cao X, Lin P, Jiang P, Li C. Characteristics of the gastrointestinal microbiome in children with autism spectrum disorder: a systematic review. *Shanghai Arch Psychiatry*. 2013 Dec; 25(6):342–53. doi: [10.3969/j.issn.1002-0829.2013.06.003](#) PMID: [24991177](#)
29. Yokota K, Takashima A, Bergstresser PR, Ariizumi K. Identification of a human homologue of the dendritic cell-associated C-type lectin-1, dectin-1. *Gene*. 2001 Jul 11; 272 (12):51–60.
30. LeibundGut-Landmann S, Gross O, Robinson MJ, Osorio F, Slack EC, Tsoni SV, et al. Syk- and CARD9-dependent coupling of innate immunity to the induction of T helper cells that produce interleukin 17. *Nat Immunol*. 2007 Jun; 8(6):630–8. PMID: [17450144](#)
31. Gerosa F, Baldani-Guerra B, Lyakh LA, Batoni G, Esin S, Winkler-Pickett RT, et al. Differential regulation of interleukin 12 and interleukin 23 production in human dendritic cells. *J Exp Med*. 2008 Jun 9; 205 (6):1447–61. doi: [10.1084/jem.20071450](#) PMID: [18490488](#)
32. Iliev ID, Funari VA, Taylor KD, Nguyen Q, Reyes CN, Strom SP, et al. Interactions between commensal fungi and the C-type lectin receptor Dectin-1 influence colitis. *Science*. 2012 Jun 8; 336(6086):1314–7. doi: [10.1126/science.1221789](#) PMID: [22674328](#)
33. Jamain S, Quach H, Betancur C, Råstam M, Colineaux C, Gillberg IC, et al. Mutations of the X-linked genes encoding neuroligins NLGN3 and NLGN4 are associated with autism. *Nat Genet*. 2003 May; 34 (1):27–9. PMID: [12669065](#)

34. Oliveira J, Busson M, Etain B, Jamain S, Hamdani N, Boukouaci W, et al. Polymorphism of Toll-like receptor 4 gene in bipolar disorder. *J Affect Disord*. 2014 Jan; 152–154:395–402. doi: [10.1016/j.jad.2013.09.043](https://doi.org/10.1016/j.jad.2013.09.043) PMID: [24176535](https://pubmed.ncbi.nlm.nih.gov/24176535/)
35. Pagan C, Delorme R, Callebort J, Goubran-Botros H, Amsellem F, Drouot X, et al. The serotonin-N-acetylserotonin-melatonin pathway as a biomarker for autism spectrum disorders. *Transl Psychiatry*. 2014; 4:e479. doi: [10.1038/tp.2014.120](https://doi.org/10.1038/tp.2014.120) PMID: [25386956](https://pubmed.ncbi.nlm.nih.gov/25386956/)
36. Stephens M, Smith NJ, Donnelly P. A new statistical method for haplotype reconstruction from population data. *Am J Hum Genet*. 2001 Apr; 68(4):978–89. PMID: [11254454](https://pubmed.ncbi.nlm.nih.gov/11254454/)
37. Stephens M, Scheet P. Accounting for decay of linkage disequilibrium in haplotype inference and missing-data imputation. *Am J Hum Genet*. 2005 Mar; 76(3):449–62. PMID: [15700229](https://pubmed.ncbi.nlm.nih.gov/15700229/)
38. Saijo S, Iwakura Y. Dectin-1 and Dectin-2 in innate immunity against fungi. *Int Immunol*. 2011 Aug; 23(8):467–72. doi: [10.1093/intimm/dxr046](https://doi.org/10.1093/intimm/dxr046) PMID: [21677049](https://pubmed.ncbi.nlm.nih.gov/21677049/)
39. Luther K, Torosantucci A, Brakhage AA, Heesemann J, Ebel F. Phagocytosis of *Aspergillus fumigatus* conidia by murine macrophages involves recognition by the dectin-1 beta-glucan receptor and Toll-like receptor 2. *Cell Microbiol*. 2007 Feb; 9(2):368–81. PMID: [16953804](https://pubmed.ncbi.nlm.nih.gov/16953804/)
40. Oliveira J, Hamdani N, Busson M, Etain B, Bennabi M, Amokrane K, et al. Association between toll-like receptor 2 gene diversity and early-onset bipolar disorder. *J Affect Disord*. 2014 Aug; 165:135–41. doi: [10.1016/j.jad.2014.04.059](https://doi.org/10.1016/j.jad.2014.04.059) PMID: [24882191](https://pubmed.ncbi.nlm.nih.gov/24882191/)
41. Jyonouchi H. Autism spectrum disorders and allergy: observation from a pediatric allergy/immunology clinic. *Expert Rev Clin Immunol*. 2010 May; 6(3):397–411. doi: [10.1586/eci.10.18](https://doi.org/10.1586/eci.10.18) PMID: [20441426](https://pubmed.ncbi.nlm.nih.gov/20441426/)
42. Horvath K, Papadimitriou JC, Rabsztyrn A, Drachenberg C, Tildon JT. Gastrointestinal abnormalities in children with autistic disorder. *J Pediatr*. 1999 Nov; 135(5):559–63. PMID: [10547242](https://pubmed.ncbi.nlm.nih.gov/10547242/)
43. Krigsman A, Boris M, Goldblatt A, Stott C. Clinical Presentation and Histologic Findings at Ileocolonoscopy in Children with Autistic Spectrum Disorder and Chronic Gastrointestinal Symptoms. *Autism Insights*. 2010; 2: 1–11.
